# Supplementary material for: Ocean-wide comparisons of mesopelagic planktonic community structures
Source: PubMed Central journal article supplement (PMC10439195; doi:10.1038/s43705-023-00279-9), 2023-08-18

Phage (Stress = 0.1 )

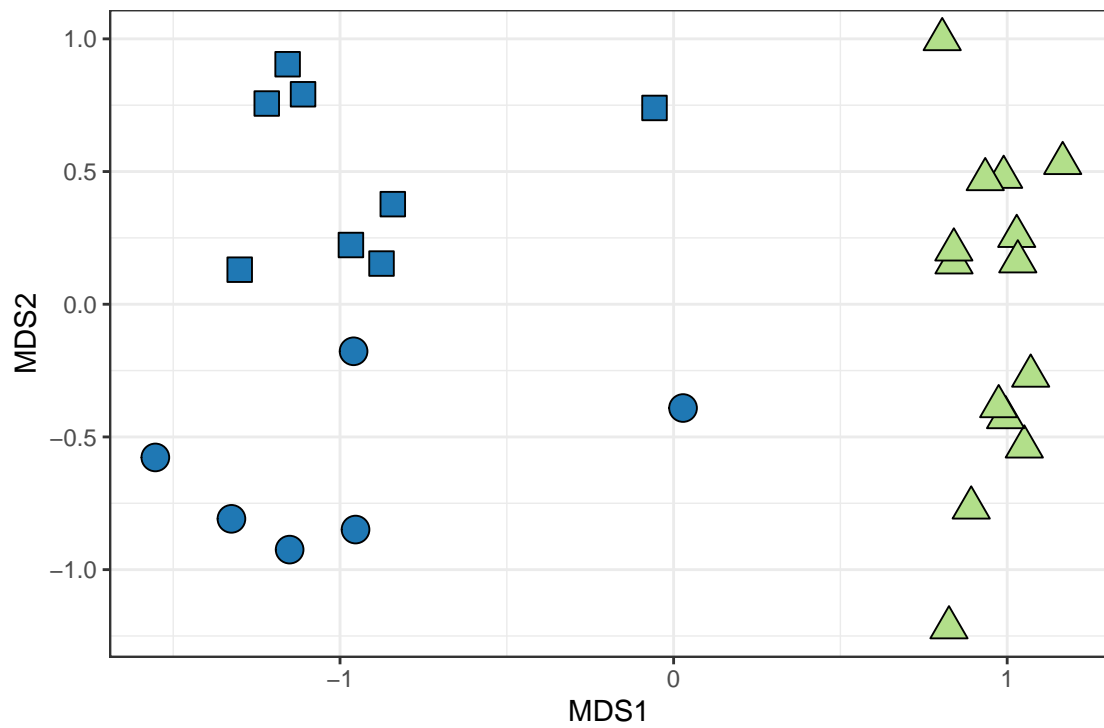

NCLDV (Stress = 0.09 )

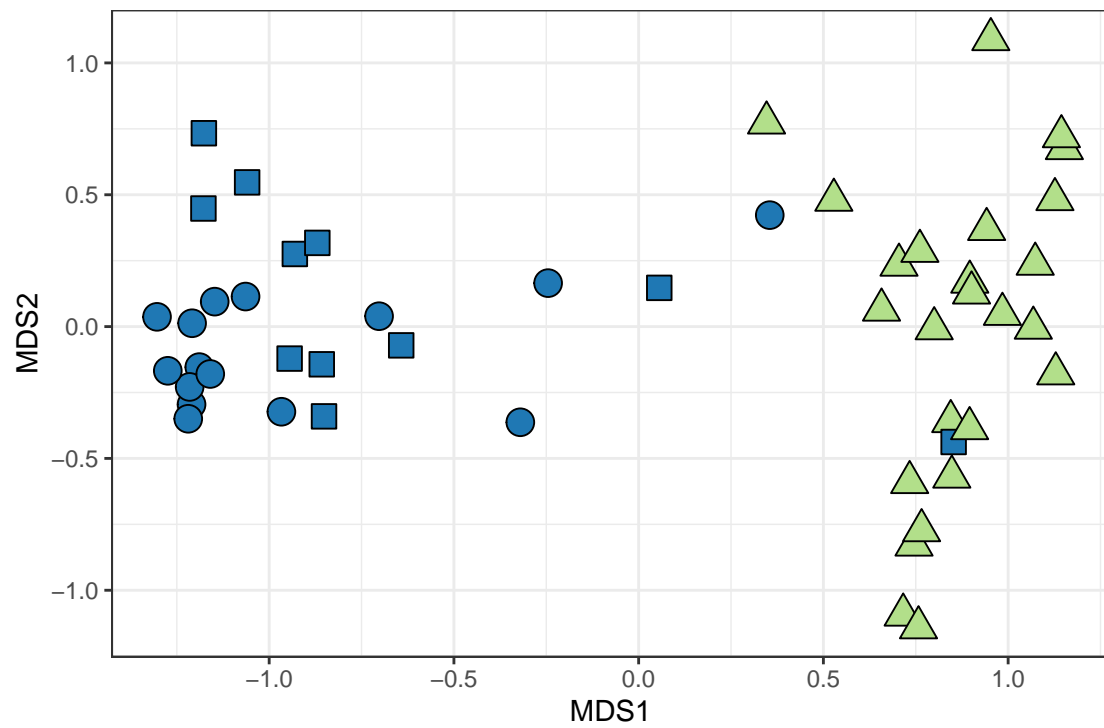

Prokaryote (Stress = 0.06 )

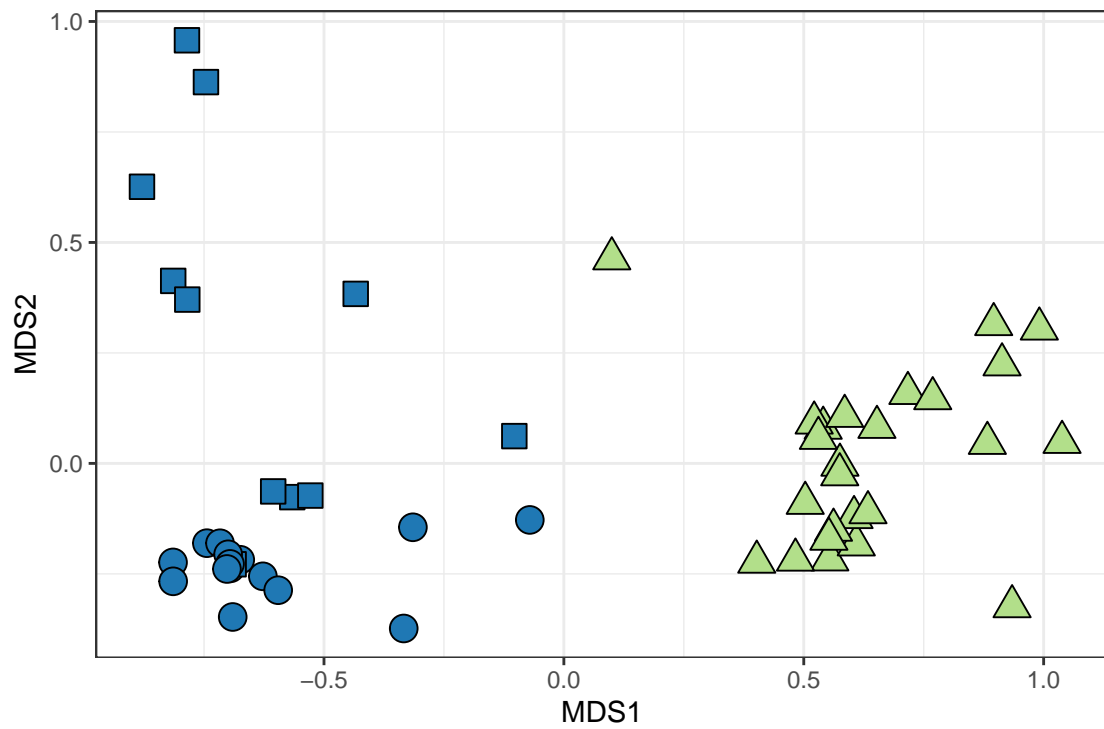

Eukaryote (Stress = 0.08 )

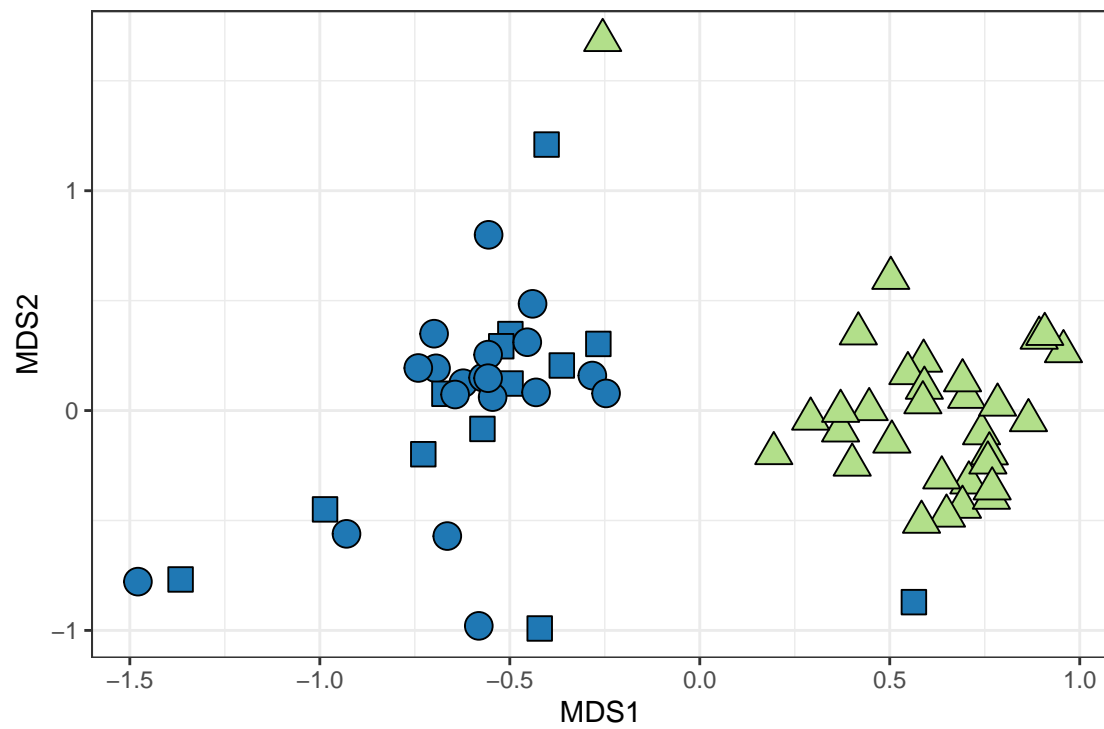

Supplement: 43705_2023_279_MOESM2_ESM.pdf [file 43705_2023_279_MOESM2_ESM.pdf]
