# Supplementary material for: Ocean-wide comparisons of mesopelagic planktonic community structures
Source: PubMed Central journal article supplement (PMC10439195; doi:10.1038/s43705-023-00279-9), 2023-08-18

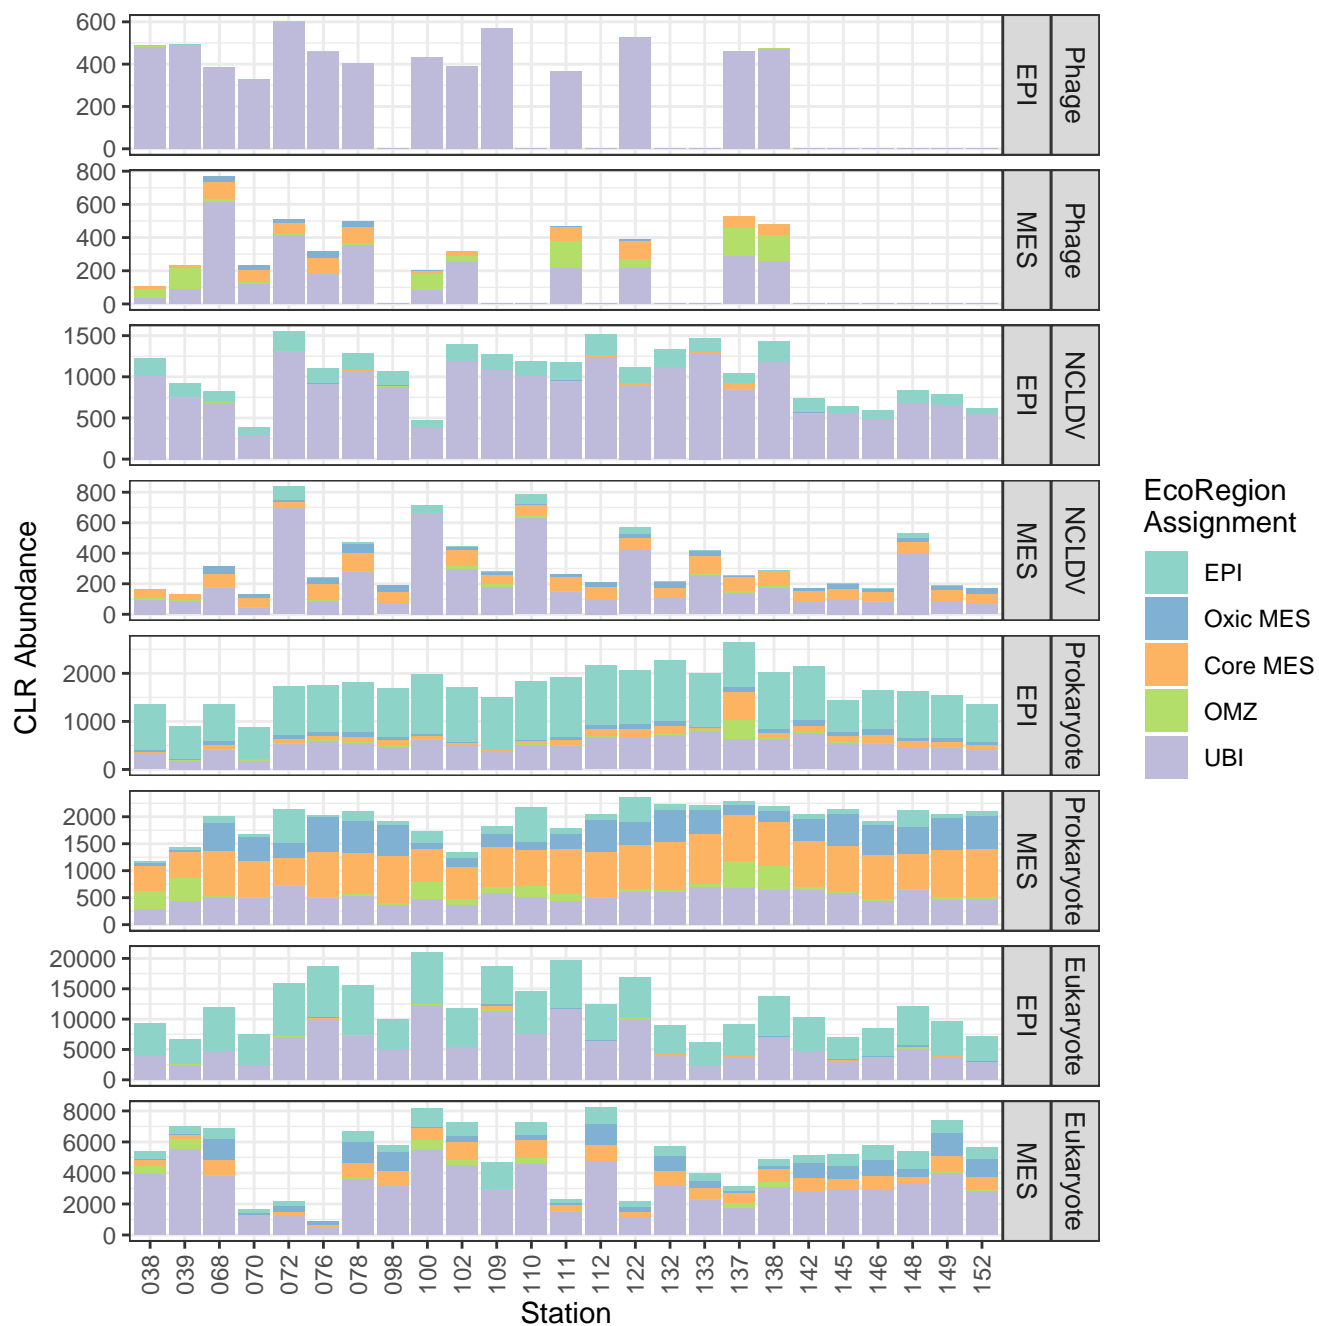

Supplement: 43705_2023_279_MOESM4_ESM.pdf [file 43705_2023_279_MOESM4_ESM.pdf]
