# Supplementary material for: Ocean-wide comparisons of mesopelagic planktonic community structures
Source: PubMed Central journal article supplement (PMC10439195; doi:10.1038/s43705-023-00279-9), 2023-08-18

EPI

MES

OMZ

Euryarchaeota

Thaumarchaeota

Woesearchaeota (DHVEG-6)

Alphaproteobacteria

Gammaproteobacteria

Deltaproteobacteria

Acidobacteria

Actinobacteria

Bacteroidetes

Chloroflexi

Cyanobacteria

Gemmatimonadetes

Marinimicrobia (SAR406 clade)

Nitrospinae

PAUC34f

Planctomycetes

Verrucomicrobia

038 039 068 070 072 076 078 098 100 102 109 110 111 112 122 132 133 137 138 142 145 146 148 149 152

068 070 072 076 078 098 112 122 132 142 145 146 148 149 152 037 038 039 100 102 109 110 111 133 137 138

EcoRegion

CLR Abundance

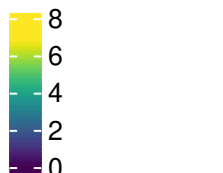

EcoRegion

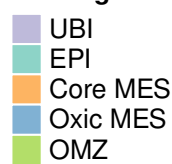

Supplement: 43705_2023_279_MOESM7_ESM.pdf [file 43705_2023_279_MOESM7_ESM.pdf]
